# Supplementary material
Source: publisher figshare collection journal article supplement (https://asha.figshare.com/articles/dataset/_/23519058)
Supplement: Supplementary file 1 [file 1]

## **Supplemental Material S2. Semistructured interview questions.**

---

1. What do you think are particular strengths of your application?
2. Are there any aspects of your application that you worry may be weaknesses toward being accepted to the programs you want to attend? If so, what do you think contributed to the weakness(es)?
3. What research experiences (if any) did you engage in during your undergraduate program? How do you feel the experiences bolstered your application to graduate school? Did it culminate in any final products (presentation, papers, etc.)?
4. If you participated in research, how did you locate, secure, and connect with the graduate student or faculty member you chose as a research advisor?
5. If you participated in research experiences, in what ways do you think that experience was beneficial?
6. What specialty practicum experiences (if any) or additional training for clinical skill building did you engage in? How do you feel the experiences bolstered your application to graduate school? Did it culminate in any final products (certificates, presentation, papers, etc.)? If so, how did you find out about this opportunity?
7. If you participated in specialty training, in what ways do you think that experience was beneficial?
8. What other service learning or volunteer experiences (if any) did you engage in during your undergraduate program. In what ways do you think that experience was beneficial?  
How do you feel the experiences bolstered your application to graduate school?
9. What barriers (if any) did you experience when you tried to engage in experiential learning opportunities (research, clinical, or service learning)? For example, did you find that opportunities were already filled, there was competition for spots, or you didn't have sufficient time with outside work?
10. What barriers (if any) did you experience that inhibited your overall learning or benefit from the undergraduate program?
11. Are there any supports or resources that you think would have been helpful to you in trying to maximize the benefits you received from your undergraduate training program?

12. Do you consider yourself to be bilingual? If so, what languages are you proficient in for basic communication skills?
13. What advice or suggestions would you share with sophomores or juniors in Communication Science and Disorders programs?
14. What advice or suggestions would you share with faculty in Communication Science and Disorders as they try to improve programs?
