# Supplementary material
Source: publisher figshare collection journal article supplement (https://asha.figshare.com/articles/dataset/_/23519058)
Supplement: Supplementary file 2 [file 1]

## Supplemental Material S1. Full survey.

Q1 By clicking the "consent" button below, you acknowledge: a) your participation in the study is voluntary; b) you are 18 years of age and c) you are aware that you may choose to terminate your participation at any time for any reason. If not, you may close this webpage now.

☐ Consent (1)

☐ I do not consent (2)

*Skip To: End of Survey If Thank you for considering sharing insights about your experiences in applying to graduate program... = I do not consent*

Page Break

Q2 How many different graduate programs are you applying to?

Not Applicable

0 10 20 30 40 50 60 70 80 90 100

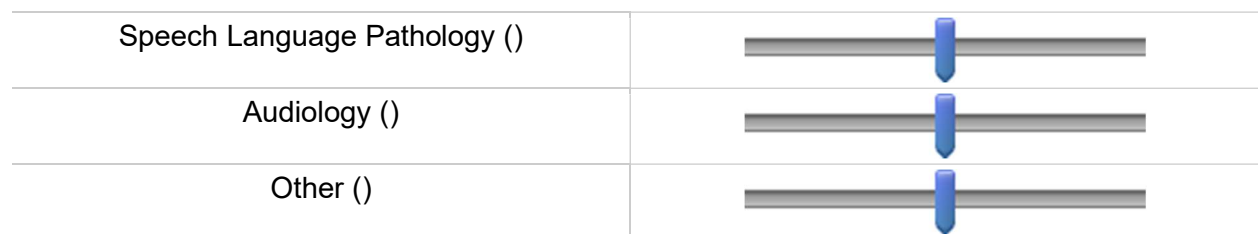

Page Break

Q3 What factors influenced your selection of programs you are applying to?

Page Break

Q4 Did the GRE requirement influence where you applied?

☐ Yes (1)

☐ No (2)

---

Page Break

Q5 To what extent did the cost of the application influence where you applied?

☐ Not at all (1)

☐ Slightly (2)

☐ Somewhat (3)

☐ Moderately (4)

☐ Strongly (5)

---

Q6 How confident do you feel that you are well prepared to ensure successful admittance to at least one of the graduate programs that you applied to?

☐ Not at all confident (1)

☐ Somewhat confident (2)

☐ Moderately confident (4)

☐ Strongly confident (5)

---

Page Break

Q7 How much help did you receive in preparing and/or editing your written responses (e.g., short answers, personal statements, etc.) on graduate applications?

- ☐ None at all (1)
- ☐ A little (2)
- ☐ A moderate amount (3)
- ☐ A lot (4)
- ☐ A great deal (5)

---

Page Break

Q8 Who provided helpful support when preparing your written responses to short answers and/or personal statements on graduate applications?

\_\_\_\_\_

---

Page Break

Q9 How difficult was it to secure letters of recommendation?

- ☐ Extremely difficult (1)
- ☐ Somewhat difficult (2)
- ☐ Neither easy nor difficult (3)
- ☐ Somewhat easy (4)
- ☐ Extremely easy (5)

---

Page Break

Q10 During your undergraduate program, approximately how many hours a week would you estimate you participated in the following activities outside of general requirements?

0 10 20 30 40 50 60 70 80 90 100

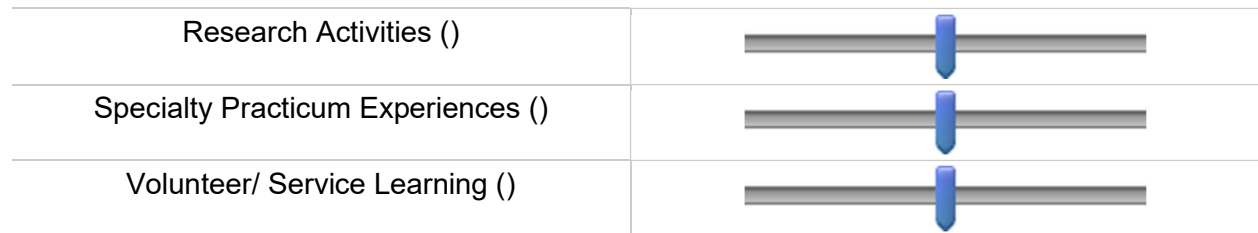

Page Break

Q11 If you are accepted to multiple graduate programs, how will you decide where to go? Specifically, what factors might influence your decision making and selection of a program?

Page Break

Q12 Do you self-identify as a member of an underrepresented racial or ethnic group? (e.g., Black, Indigenous, People of Color?)

☐ No (1)

☐ Yes (8)

Page Break

*Display This Question:*

*If Do you self-identify as a member of an underrepresented racial or ethnic group? (e.g., Black, Ind... = Yes*

Q13 Which of the following best describes your ethnicity?

- ☐ Hispanic or Latine (1)
- ☐ Not Hispanic or Latine (2)

---

*Display This Question:*

*If Do you self-identify as a member of an underrepresented racial or ethnic group? (e.g., Black, Ind...  
= Yes*

Q14 Which of the following best describes your race?

- ☐ Asian (4)
- ☐ Black or African American (1)
- ☐ American Indian or Native Alaskan (2)
- ☐ Native Hawaiian or Pacific Islander (3)
- ☐ Biracial or Multiracial (5)
- ☐ White (6)
- ☐ Other (please specify) (7) \_\_\_\_\_

---

Page Break

Q15 Are you a student with a disability?

- ☐ No (1)
- ☐ Yes (2)
- ☐ Prefer not to say (4)

---

Page Break

Q16 Are you a first-generation college student?

- ☐ No (1)
- ☐ Yes (2)
- ☐ I'm not sure (3)
