# Supplementary material
Source: publisher figshare collection journal article supplement (https://asha.figshare.com/articles/dataset/_/23519058)

### Supplemental Material S3. Leximancer concept maps of barriers and resources.

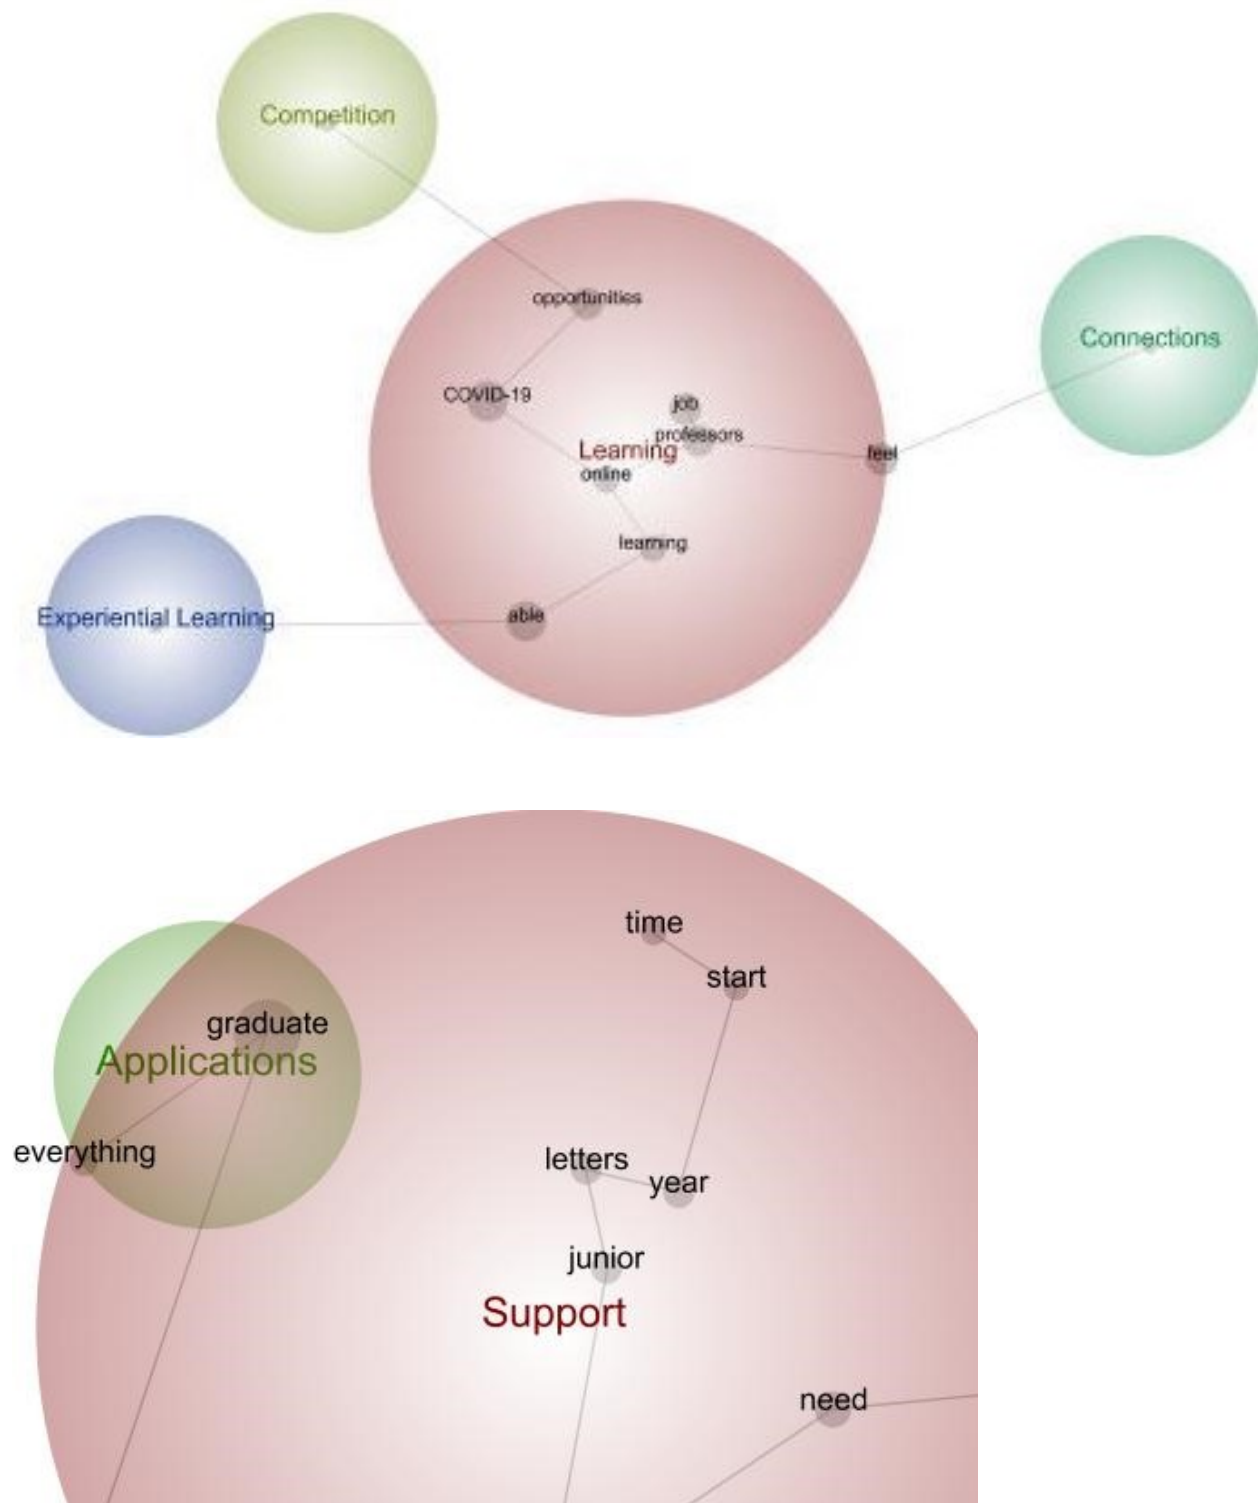

Supplement: Supplementary file 3 [file 1]
